# Supplementary material
Source: PubMed Central journal article supplement (PMC2855194)
Supplement: NIHMS193183-supplement-supporting_material.pdf [file NIHMS193183-supplement-supporting_material.pdf]

Supporting information

***Advanced Materials***

Title: *“Biomimetic Underwater Adhesives with Environmentally Triggered Setting Mechanisms”*

Authors: Hui Shao and Russell J. Stewart

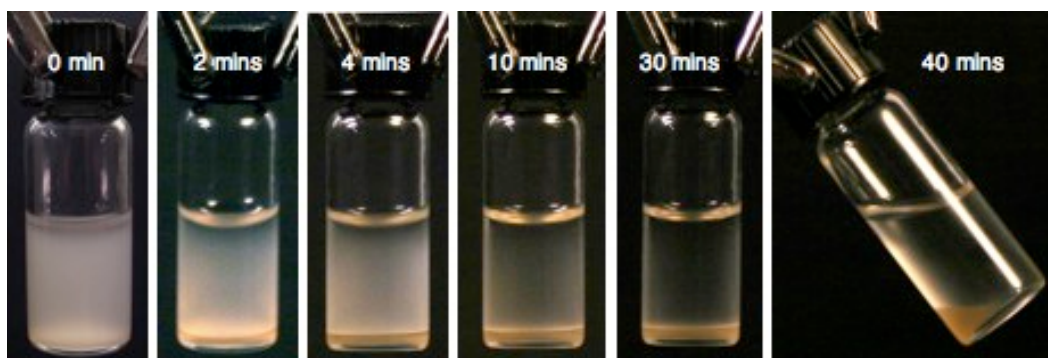

Time course of complex coacervate formation. When mixed the components of the adhesive form a suspension of polyelectrolyte complexes (PECs). Over ~30 minutes the PECs condense into an immiscible liquid phase, a complex coacervate, at the bottom of the bottle.
